# Supplementary material for: A titanium-based oxysulfide photocatalyst: La5Ti2MS5O7 (M = Ag, Cu) for water reduction and oxidation
Source: Royal Society of Chemistry journal article supplement (doi:10.1039/c2cp43132g), 2012-01-01
Supplement: c2cp43132g.pdf [file c2cp43132g.pdf]

## Electronic Supplementary Information

### A titanium-based oxysulfide photocatalyst: $\text{La}_5\text{Ti}_2\text{MS}_5\text{O}_7$ (M = Ag, Cu) for water reduction and oxidation

#### List of the authors

Takahiro Suzuki,<sup>a</sup> Takashi Hisatomi,<sup>a</sup> Kentaro Teramura,<sup>b</sup> Yoshiki Shimodaira,<sup>c</sup> Hisayoshi Kobayashi<sup>d</sup> and Kazunari Domen<sup>\*a</sup>

#### \*Corresponding author

Prof. Kazunari Domen

Department of Chemical System Engineering, School of Engineering, The University of Tokyo, 7-3-1, Hongo, Bunkyo-ku, Tokyo 113-8656, Japan.

Fax: +81-3-5841-8838

Tel: +81-3-5841-1148

E-mail: domen@chemsys.t.u-tokyo.ac.jp

#### Affiliations

<sup>a</sup> Department of Chemical System Engineering, School of Engineering, The University of Tokyo, 7-3-1, Hongo, Bunkyo-ku, Tokyo 113-8656, Japan.

<sup>b</sup> Department of Molecular Engineering, Graduate School of Engineering, Kyoto University, Kyoto 615-8510, Japan.

<sup>c</sup> Corporate R&D Center, Showa Denko K. K., 1-1-1 Ohnodai, Midori-ku, Chiba, Chiba 267-0056, Japan.

<sup>d</sup> Department of Chemistry and Materials Technology, Faculty of Engineering and Design, Kyoto Institute of Technology, Goshokaido-cho, Matsugasaki, Sakyo-ku, Kyoto 606-8585, Japan.

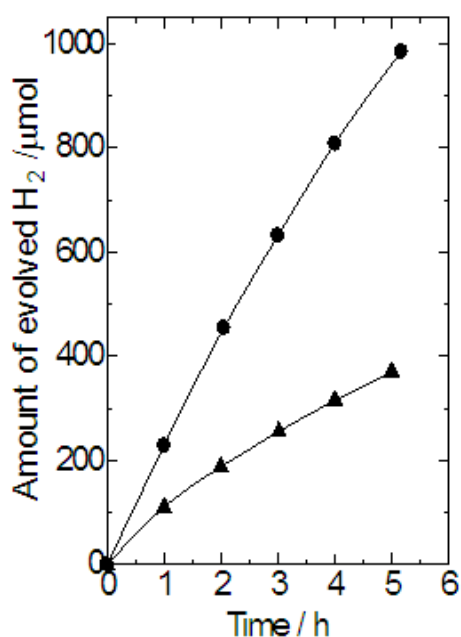

**Fig. S1** Time courses of H<sub>2</sub> evolution over Pt-loaded La<sub>5</sub>Ti<sub>2</sub>MS<sub>5</sub>O<sub>7</sub> in 0.01 M Na<sub>2</sub>S - 0.01 M Na<sub>2</sub>SO<sub>3</sub> aqueous solution under visible light irradiation ( $\lambda > 420$  nm) (circle: M = Ag, Pt (0.5 wt%)-loaded, triangle: M = Cu, Pt (0.3 wt%)-loaded).

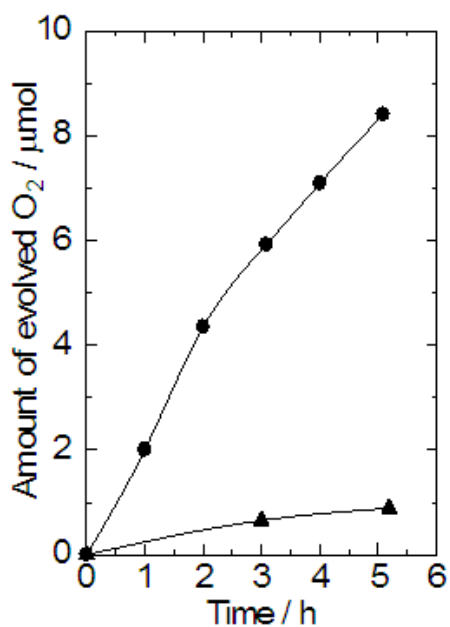

**Fig. S2** Time courses of O<sub>2</sub> evolution over IrO<sub>2</sub>-loaded La<sub>5</sub>Ti<sub>2</sub>MS<sub>5</sub>O<sub>7</sub> in 0.01 M AgNO<sub>3</sub> aqueous solution under visible light irradiation ( $\lambda > 420$  nm) (circle: M = Ag, IrO<sub>2</sub> (2 wt%)-loaded, triangle: M = Cu, IrO<sub>2</sub> (5 wt%)-loaded).
